# Supplementary material for: Copper(0)-catalyzed aerobic oxidative synthesis of imines from amines under solvent-free conditions
Source: Royal Society of Chemistry journal article supplement (doi:10.1039/c2ra20339a), 2012-01-01

## Supporting Information

### **Copper(0)—catalyzed aerobic oxidative synthesis of imines from amines under solvent-free conditions**

Rajendra D Patil and Subbarayappa Adimurthy\*

*Central Salt and Marine Chemicals Research Institute (Council of Scientific & Industrial Research),  
G. B. Marg, Bhavnagar 364 021, Gujarat, India. Fax: +912782567562 E-mail:  
[adimurthy@csmcri.org](mailto:adimurthy@csmcri.org)*

| <b>Table of Contents</b>                                                | <b>Page no.</b> |
|-------------------------------------------------------------------------|-----------------|
| <b>Table S1. Monitoring Reaction Progress with Time</b>                 | <b>S2</b>       |
| <b><sup>1</sup>H NMR and <sup>13</sup>C NMR Spectra of the Products</b> | <b>S3-S15</b>   |
| <b>GC-MS Spectra of Selected compounds</b>                              | <b>S16-S18</b>  |

Table S1. Progress of the reaction with time<sup>a</sup>

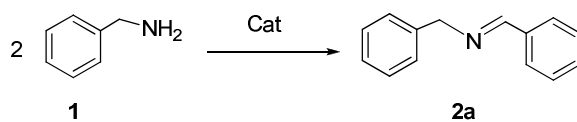

| Sr. No. | Time/h | Conv. <sup>b</sup> | Imine Yield <sup>b</sup> |
|---------|--------|--------------------|--------------------------|
| 1       | 5      | 27                 | 27                       |
| 2       | 10     | 44                 | 43                       |
| 3       | 18     | 92                 | 92                       |
| 4       | 20     | 100                | 99>                      |

<sup>a</sup> Conditions: **1** (10 mmol), Cu (0.05 mmol), 90°C, open atmosphere.

<sup>b</sup> GC conversion.

Reaction plot for conversion v/s time

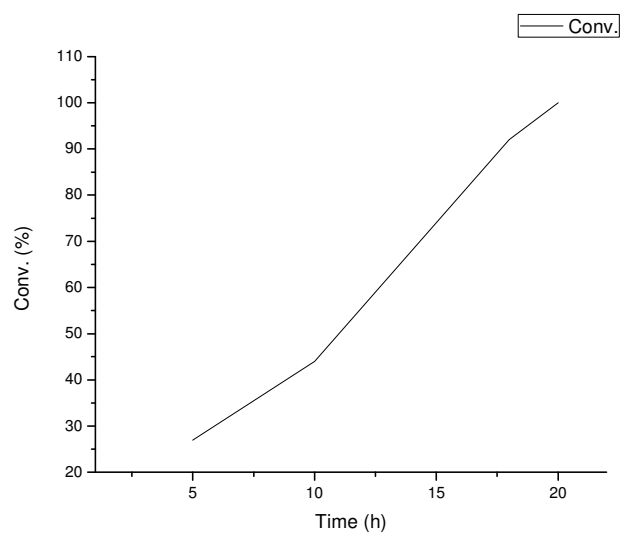

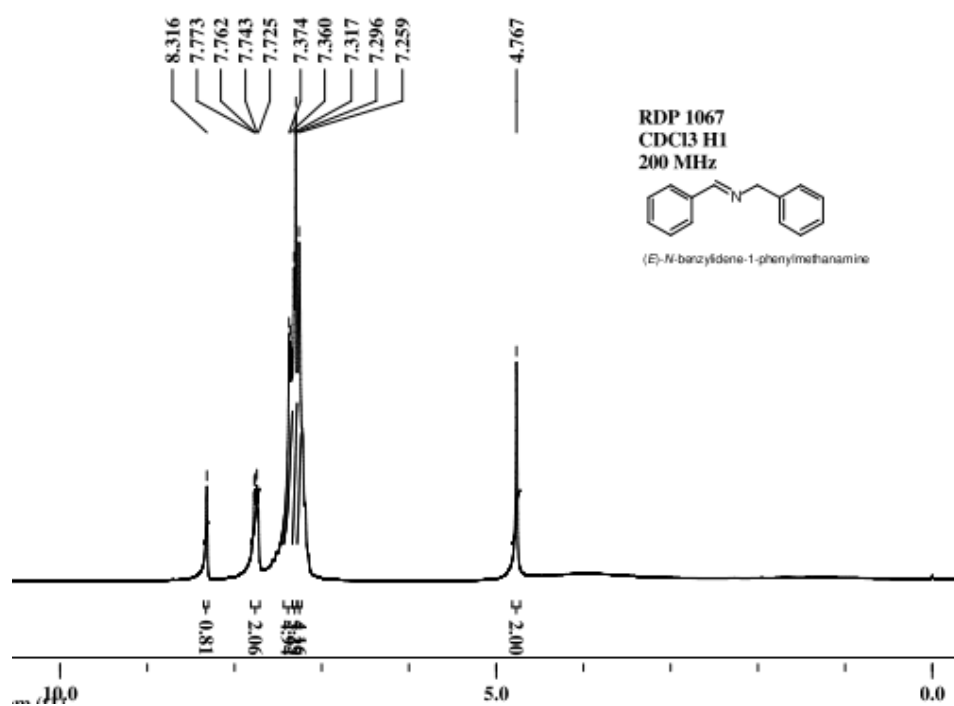

<sup>1</sup>H NMR (Entry 1, Table 2)

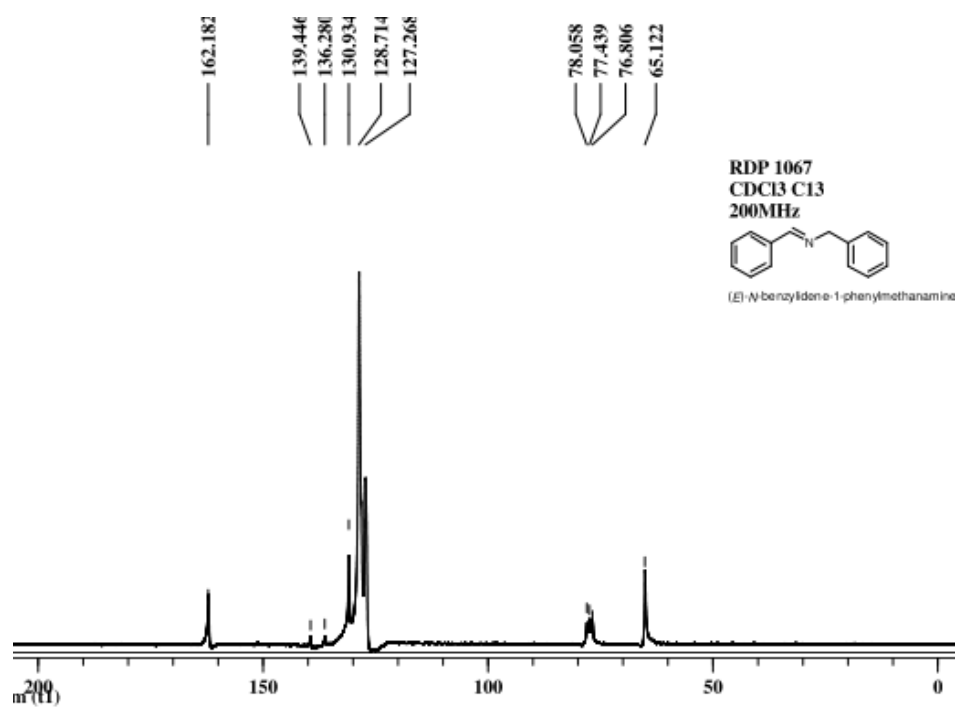

<sup>13</sup>C NMR (Entry 1, Table 2)

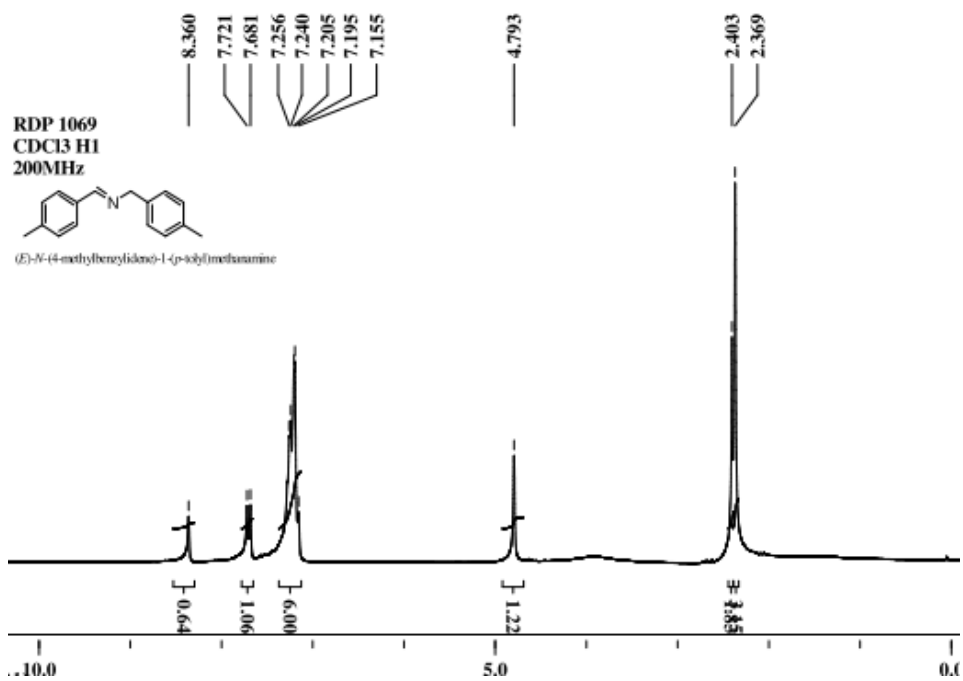

<sup>1</sup>H NMR (Entry 2, Table 2)

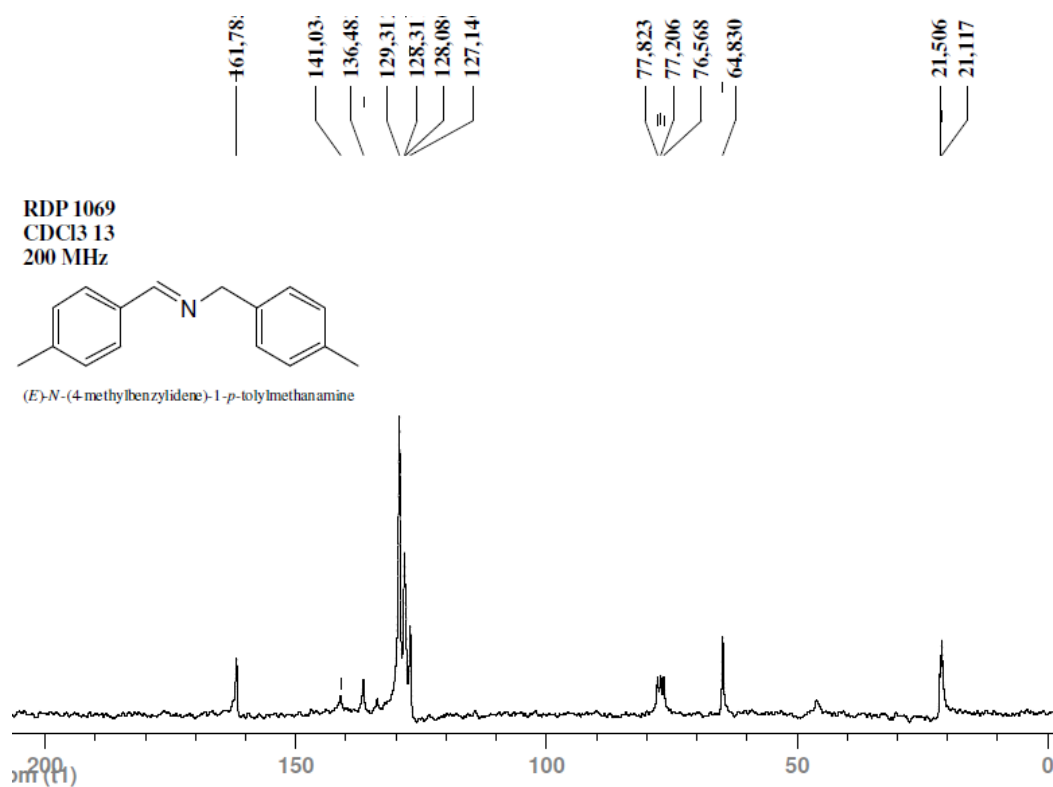

<sup>13</sup>C NMR (Entry 2, Table 2)

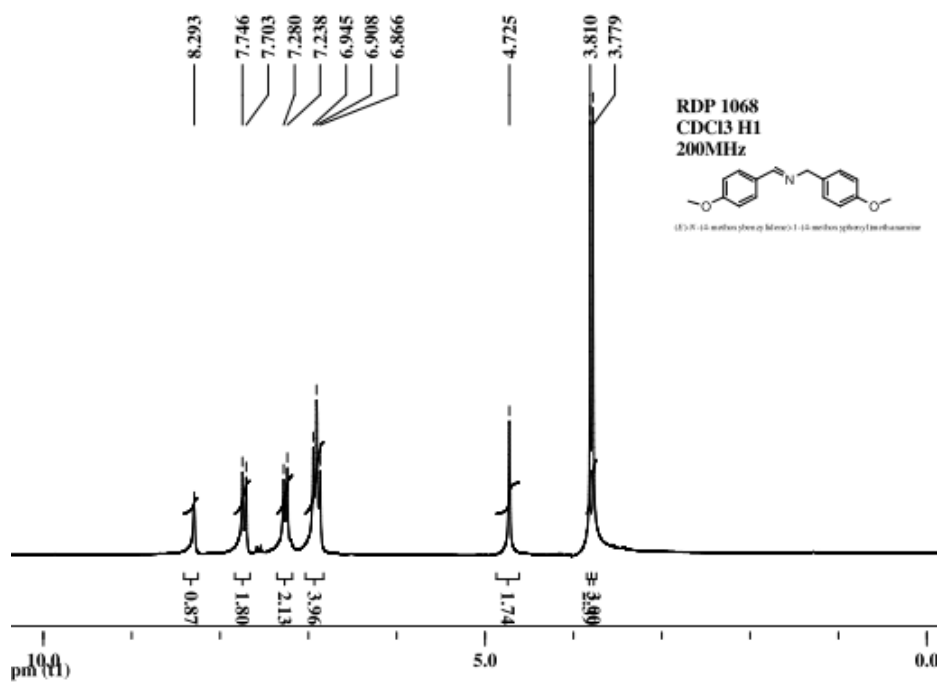

<sup>1</sup>H NMR (Entry 3, Table 2)

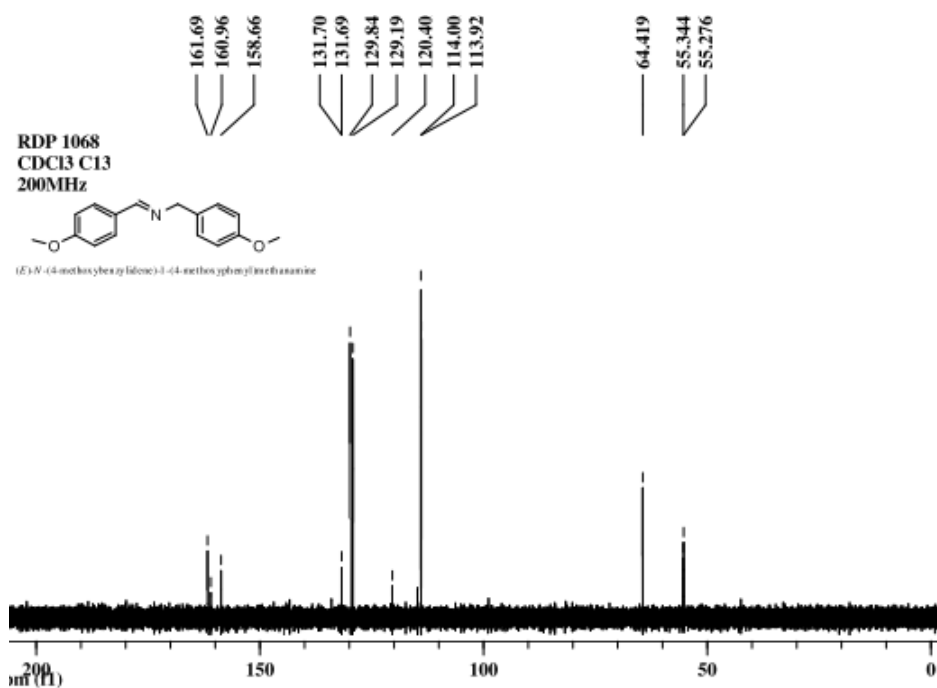

<sup>13</sup>C NMR (Entry 3, Table 2)

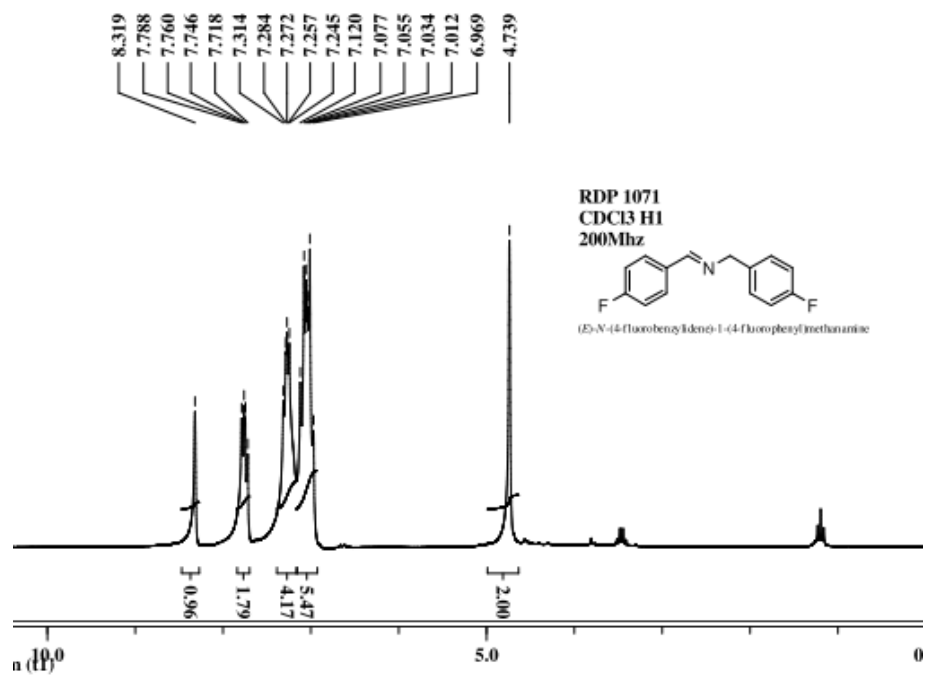

<sup>1</sup>H NMR (Entry 4, Table 2)

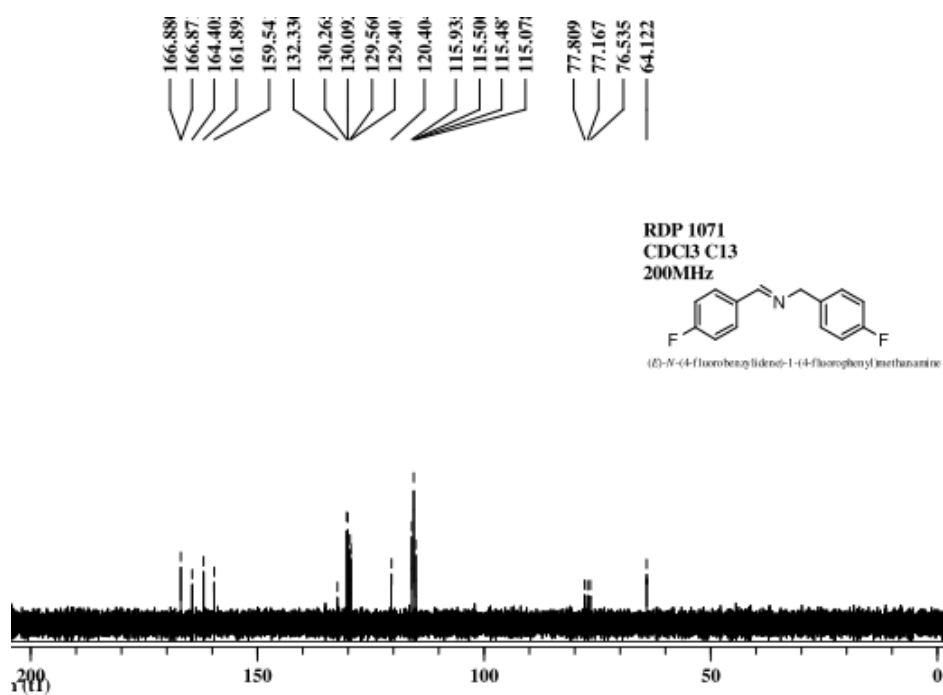

<sup>13</sup>C NMR (Entry 4, Table 2)

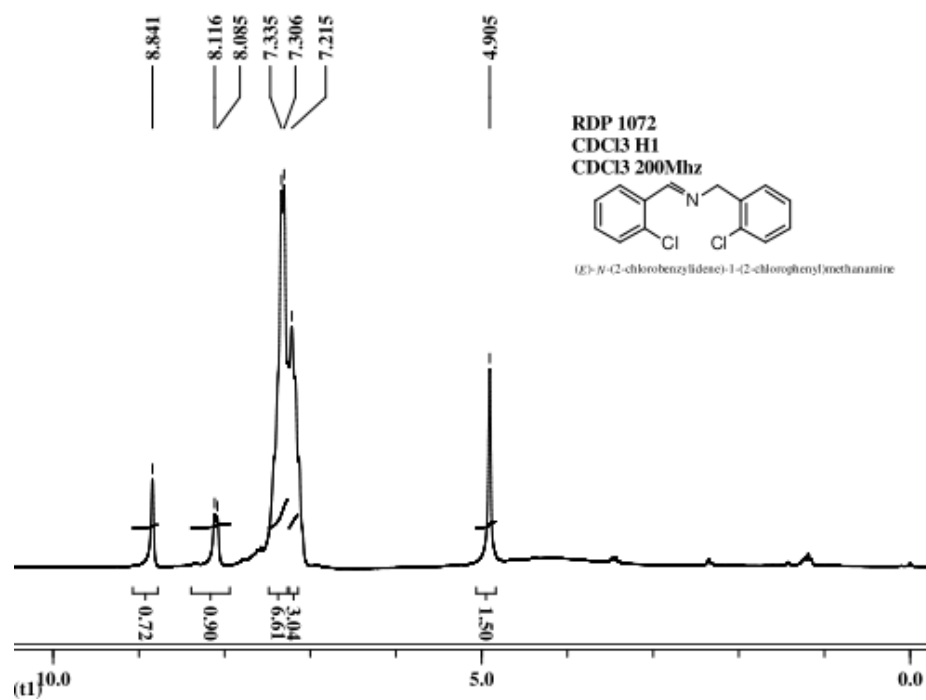

<sup>1</sup>H NMR (Entry 5, Table 2)

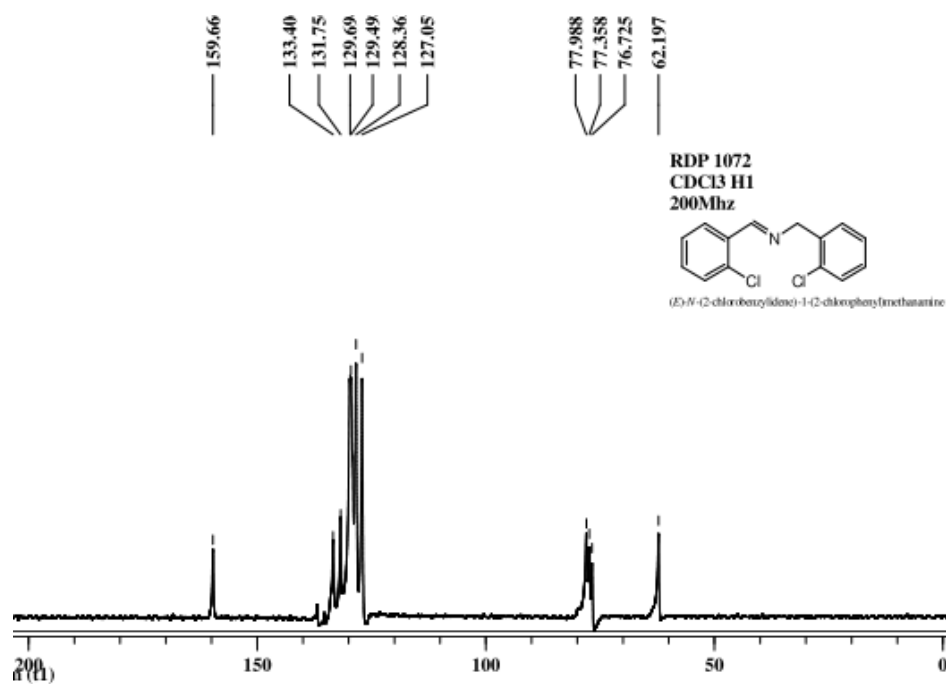

<sup>13</sup>C NMR (Entry 5, Table 2)

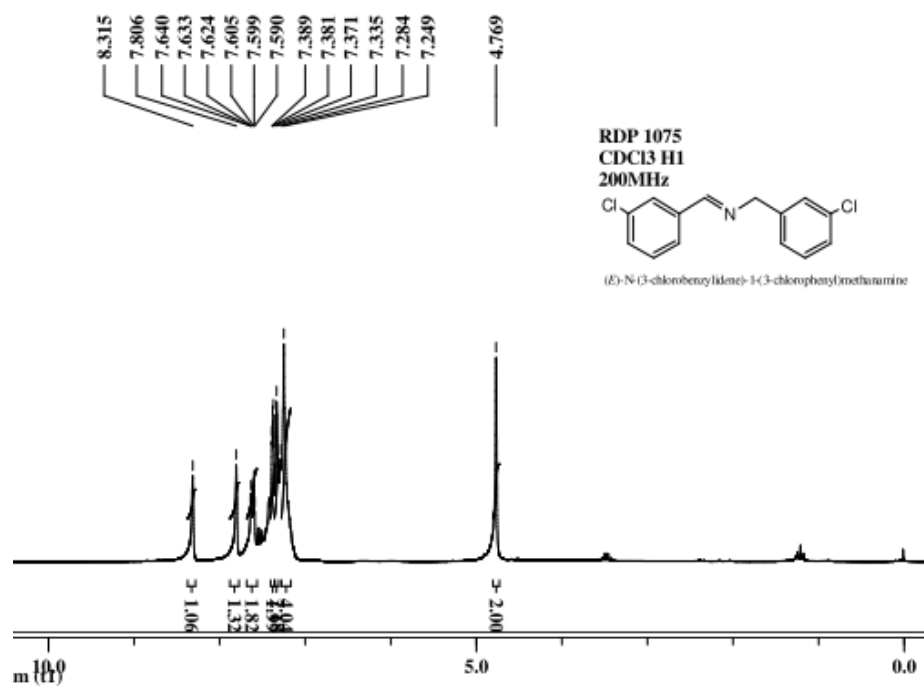

<sup>1</sup>H NMR (Entry 6, Table 2)

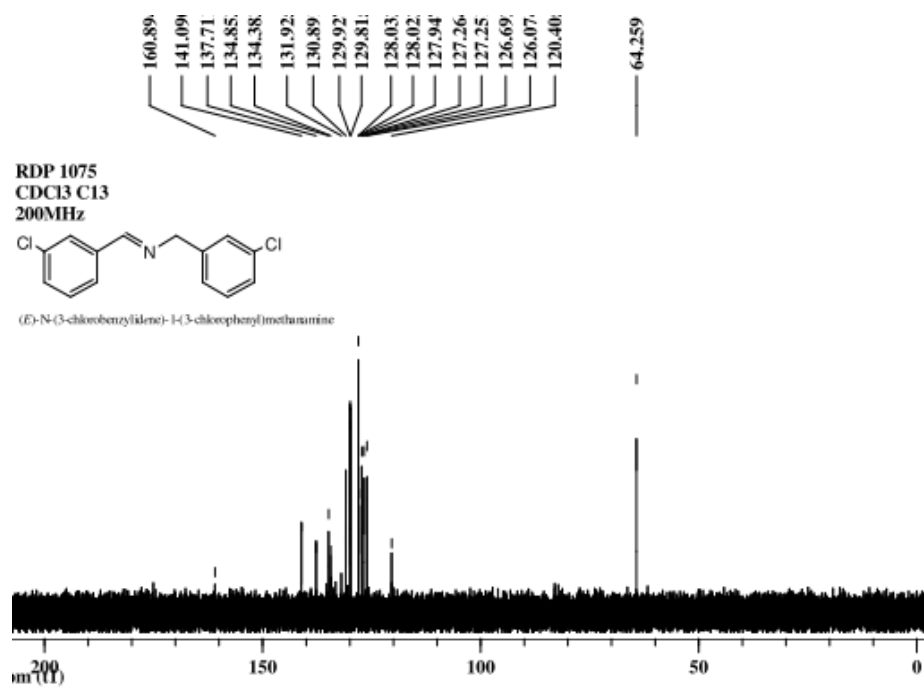

<sup>13</sup>C NMR (Entry 6, Table 2)



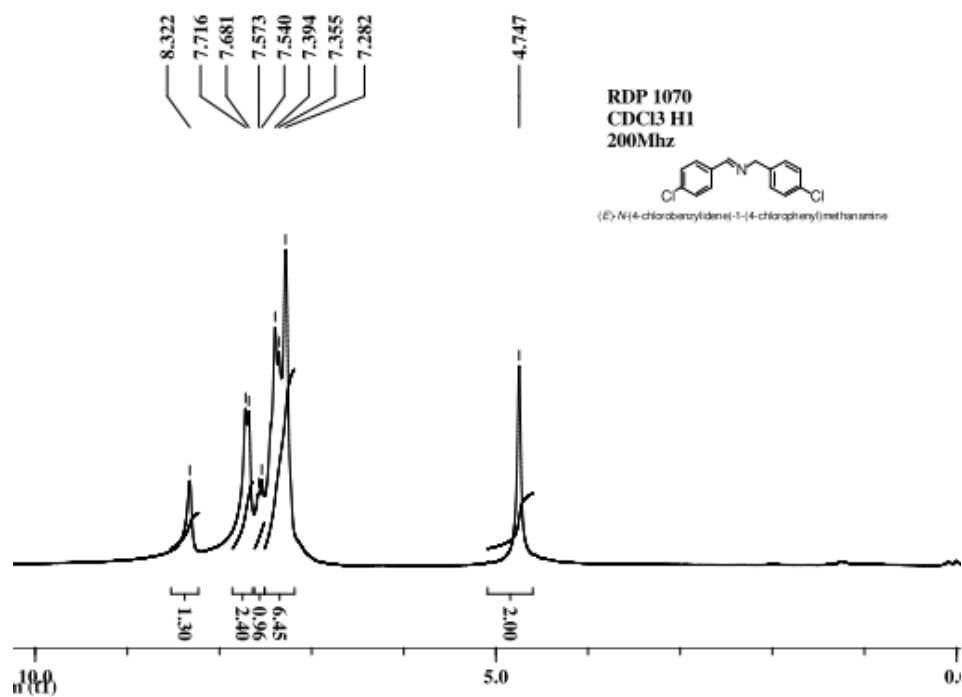

<sup>1</sup>H NMR (Entry 7, Table 2)

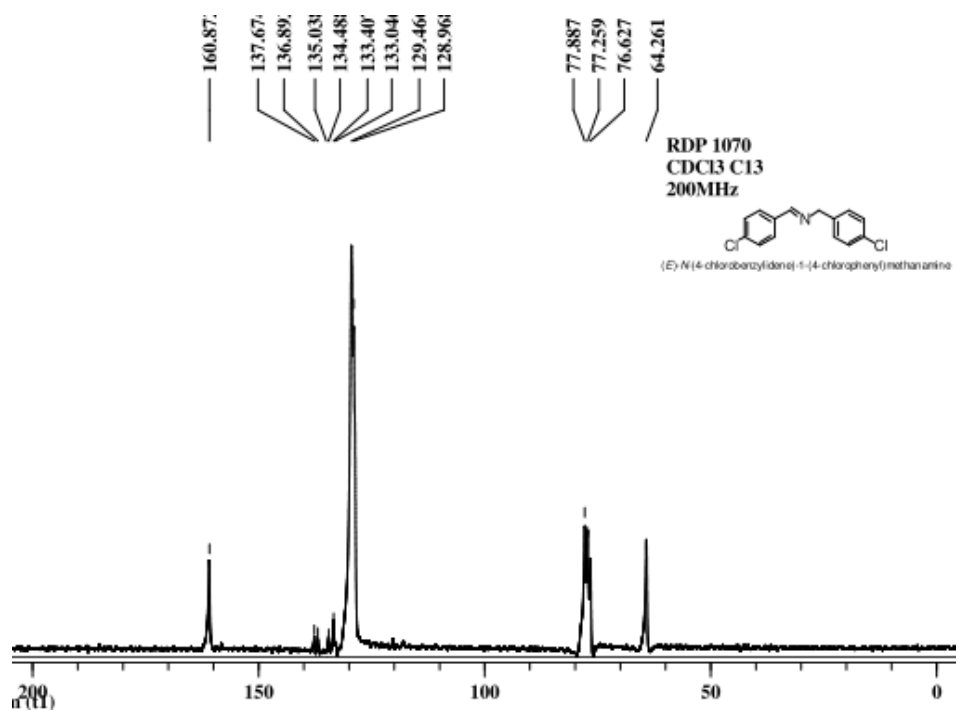

<sup>13</sup>C NMR (Entry 7, Table 2)

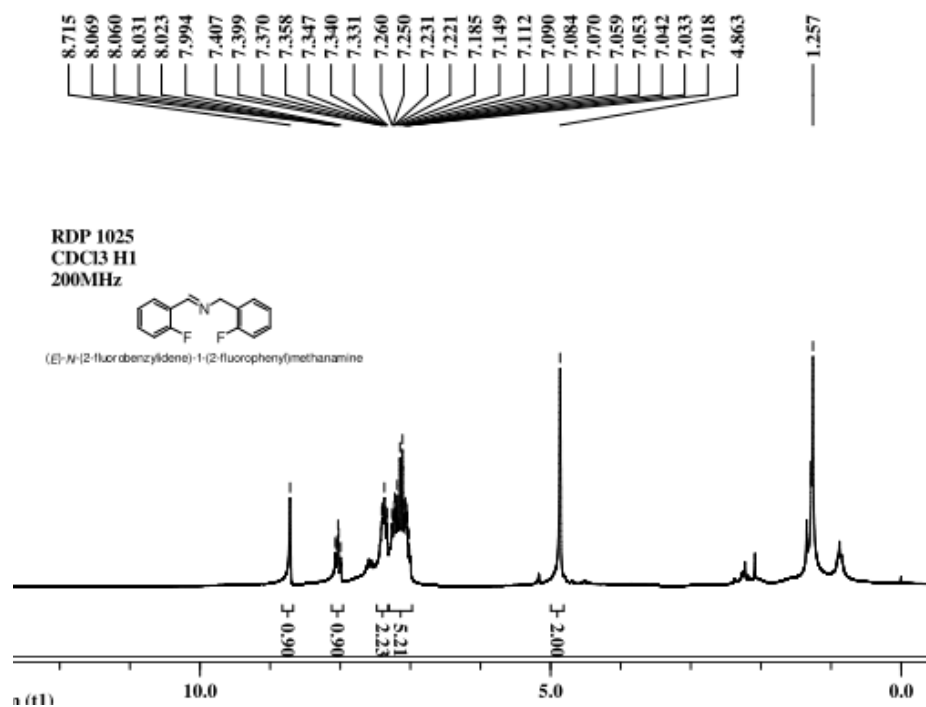

<sup>1</sup>H NMR (Entry 8, Table 2)

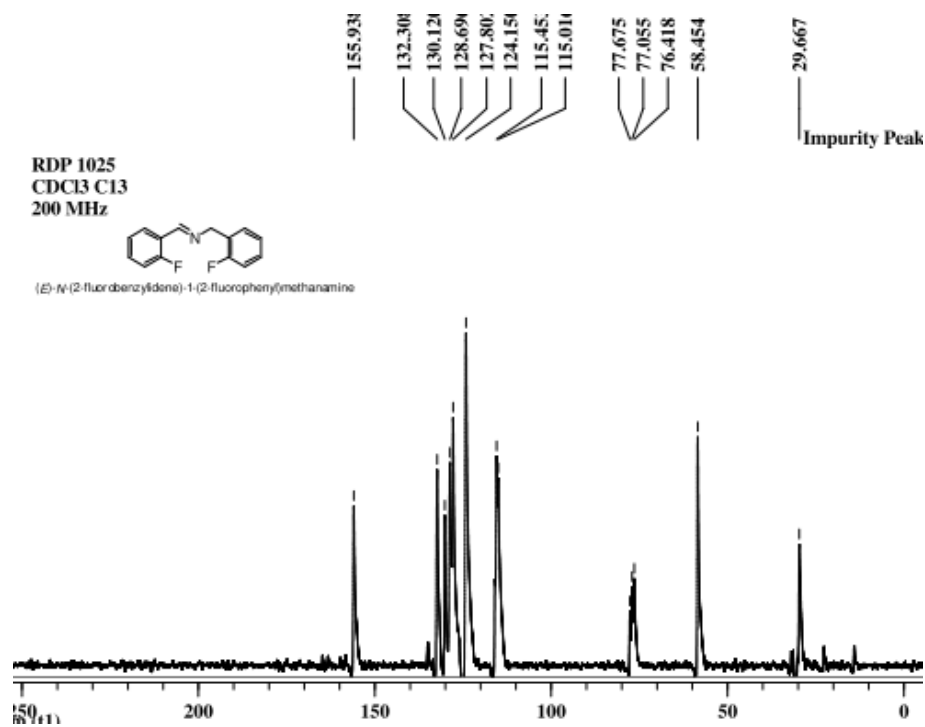

<sup>13</sup>C NMR (Entry 8, Table 2)

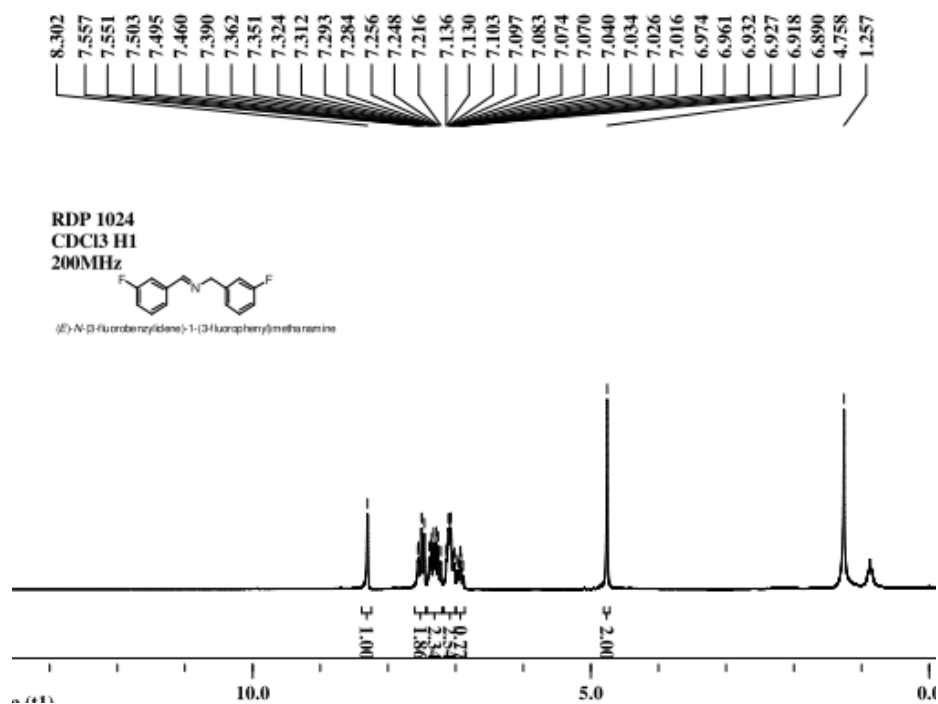

<sup>1</sup>H NMR (Entry 9, Table 2)

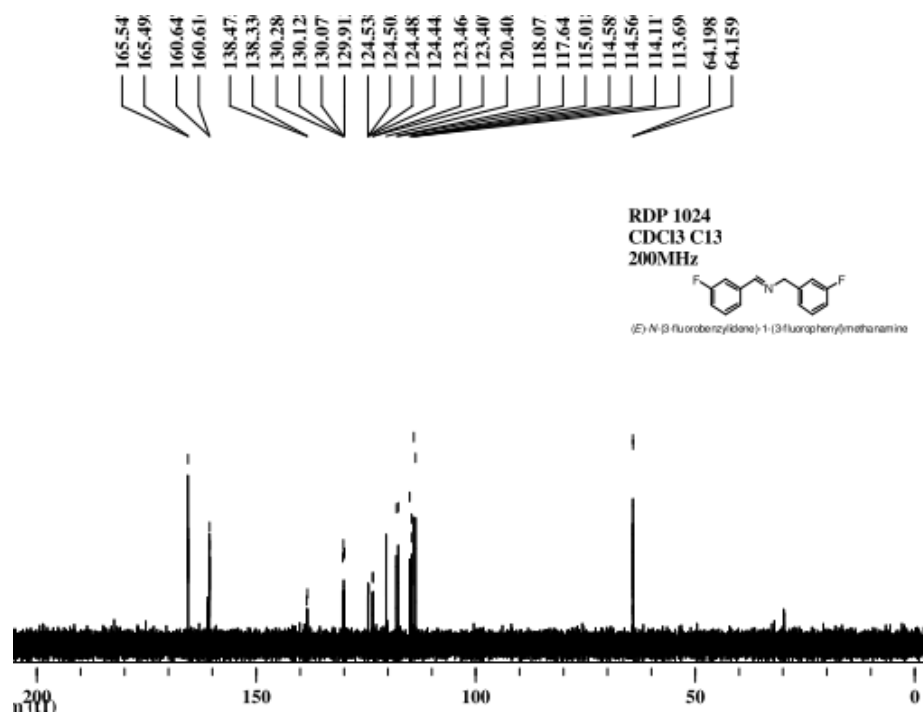

<sup>13</sup>C NMR (Entry 9, Table 2)

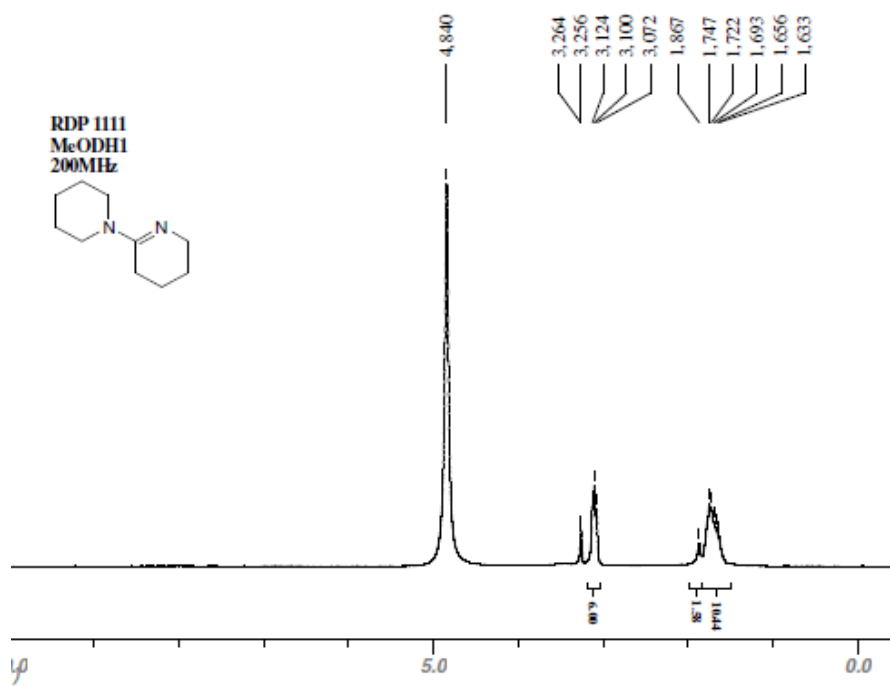

$^1\text{H}$  NMR (Entry 12, Table 2)

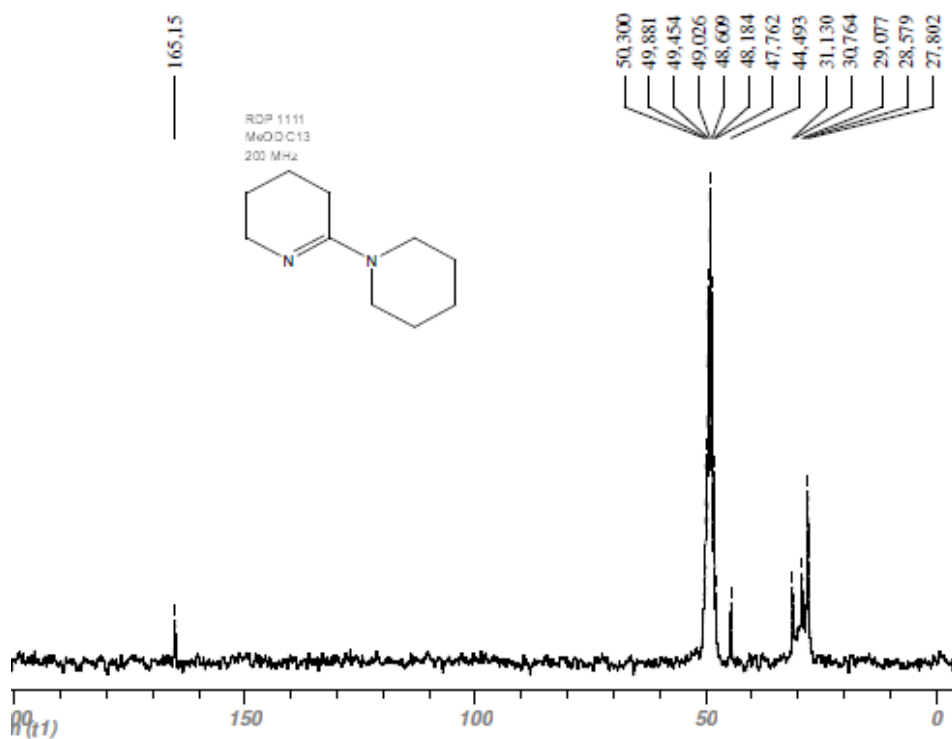

$^{13}\text{C}$  NMR (Entry 12, Table 2)

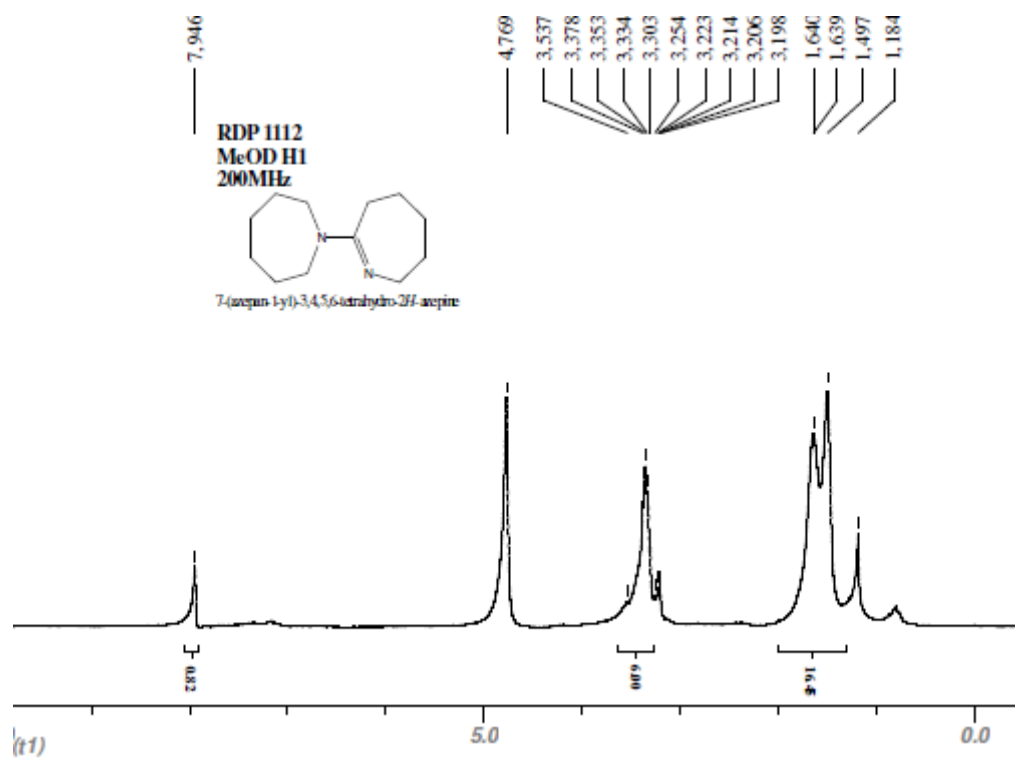

<sup>1</sup>H NMR (Entry 13, Table 2)

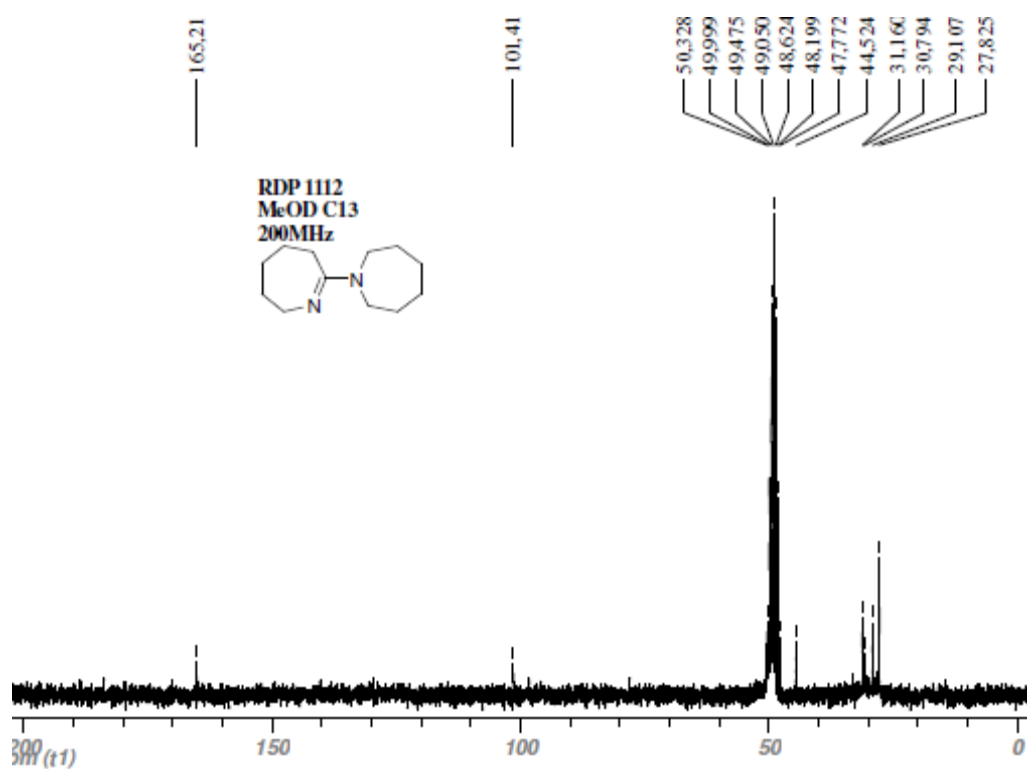

<sup>13</sup>C NMR (Entry 13, Table 2)

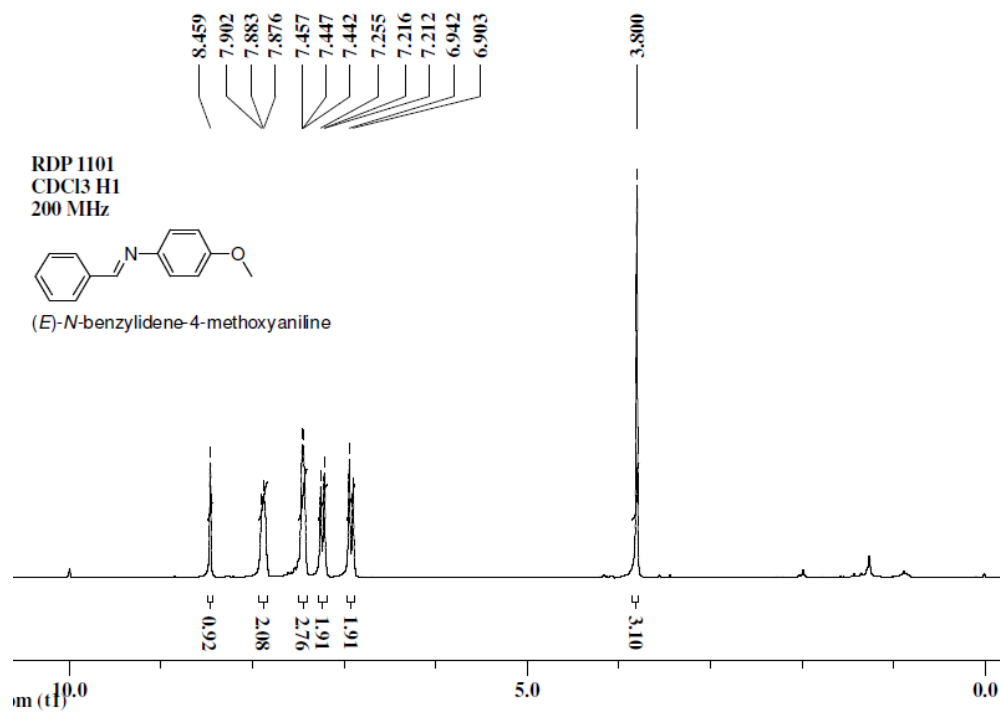

<sup>1</sup>H NMR (Entry 15, Table 2)

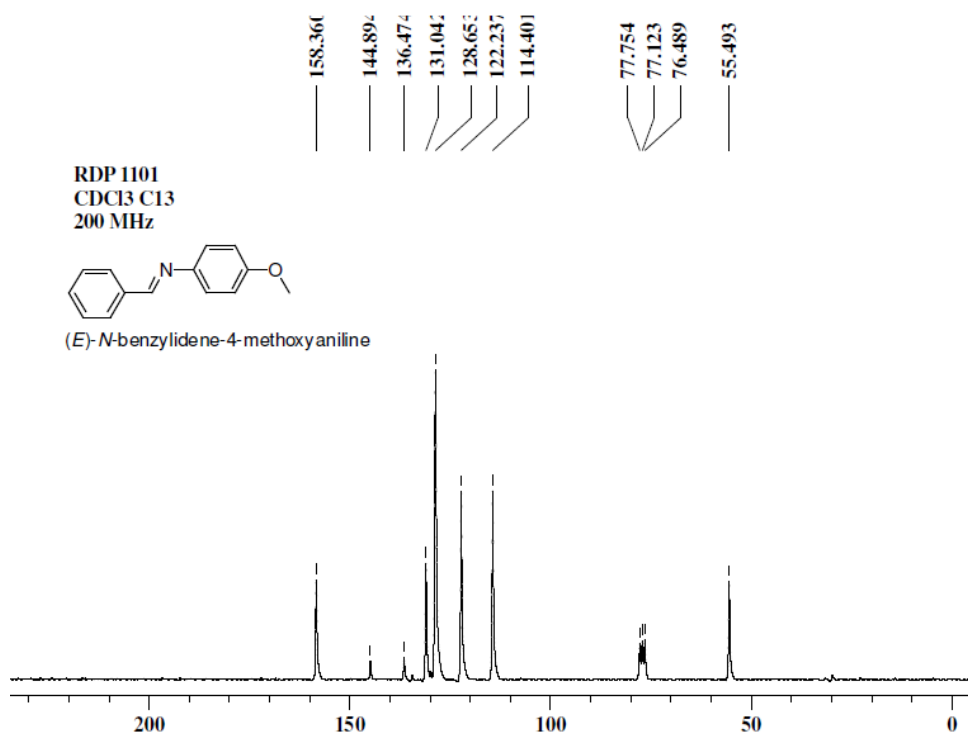

<sup>13</sup>C NMR (Entry 15, Table 2)

## GC-MS Spectra of Entry 1 Table 2

Central Salt and Marine Chemicals Research Institute

9/6/2011 16:38:26

C:\GCMSsolution\Data\Project1\ANALYTICAL SCINCE\RAJENDRA PATIL\RDP 1007\_RTX 5\_011010\_01.QGD

### Sample Information

Analyzed by : Admin  
Analyzed : 10/1/2010 9:59:13 AM  
Sample Type : Unknown  
Sample Name : RDP 1007  
Sample ID : RDP 1007  
Vial # : 1  
Injection Volume : 0.200  
Data File : C:\GCMSsolution\Data\Project1\ANALYTICAL SCINCE\RAJENDRA PATIL\RDP 1007\_RTX 5\_011010\_01.QGD  
Method File : C:\GCMSsolution\Data\Project1\PNBRR.qgm  
Report File :  
Tuning File : C:\GCMSsolution\System\Tune1\tuning\_310510\_EI.qgt

Chromatogram RDP 1007 C:\GCMSsolution\Data\Project1\ANALYTICAL SCINCE\RAJENDRA PATIL\RDP 1007\_RTX 5\_011010\_01.QGD

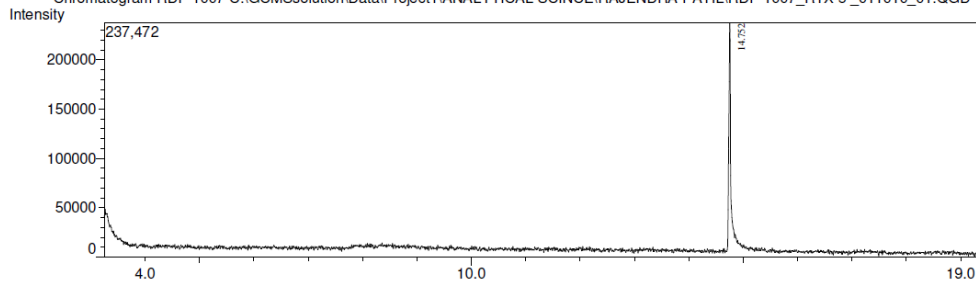

| Peak# | R.Time | Area   | Area%  | Height | Height% | Name        | Base m/z |
|-------|--------|--------|--------|--------|---------|-------------|----------|
| 1     | 14.752 | 611012 | 100.00 | 231971 | 100.00  | Benzylimine | 91.00    |

### Spectrum

Line#1 R.Time:14.8(Scan#:1381)  
MassPeaks:322  
RawMode:Averaged 14.7-14.8(1380-1382) BasePeak:91(75247)  
BG Mode:Calc. from Peak

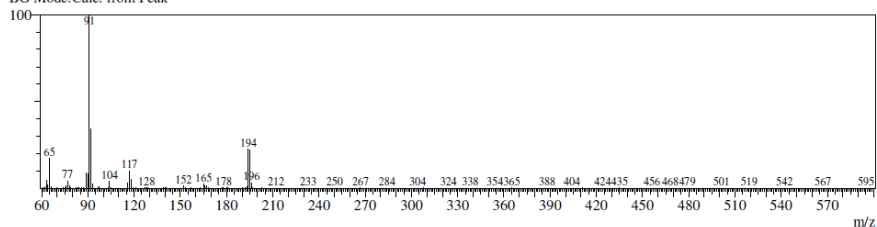

## GC-MS Spectra of Entry 10 Table 2

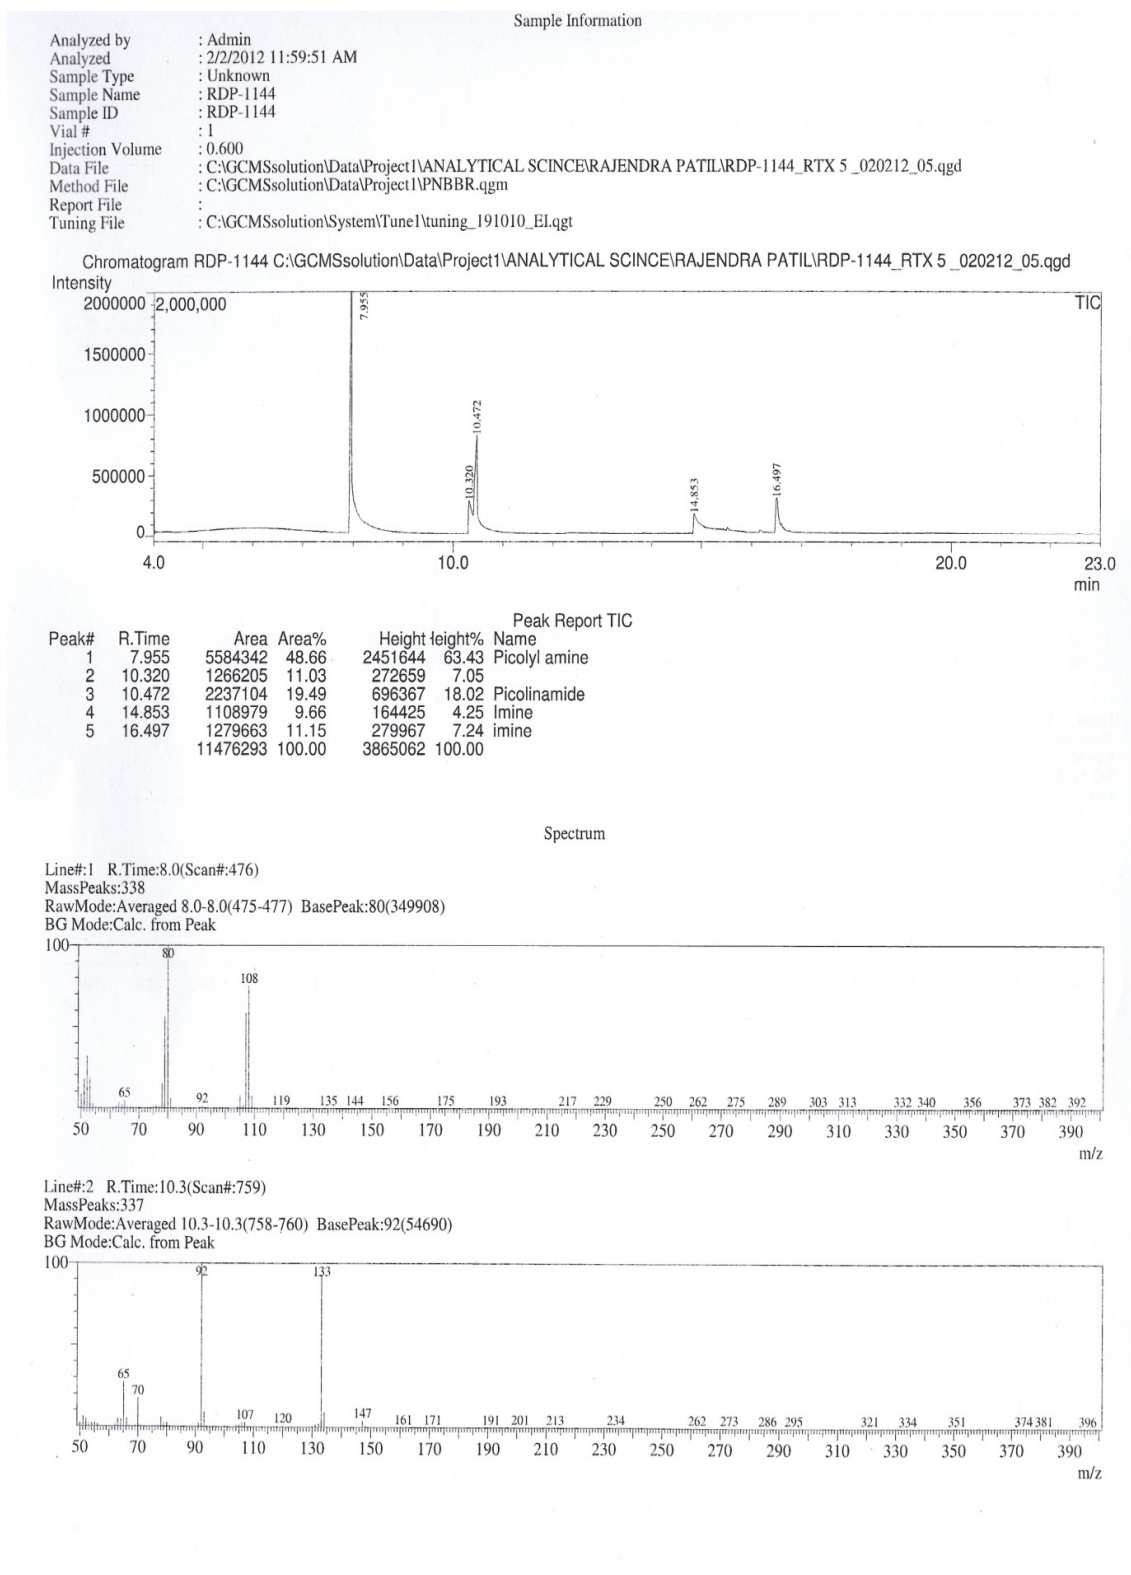



Line#:3 R.Time:10.5(Scan#:778)  
MassPeaks:313  
RawMode:Averaged 10.5-10.5(777-779) BasePeak:79(198777)  
BG Mode:Calc. from Peak

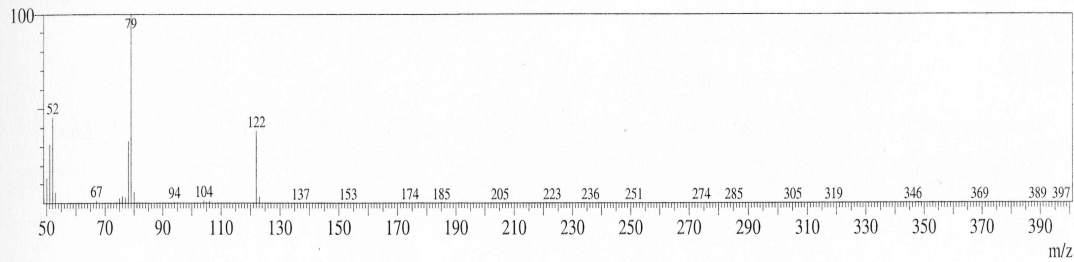

Line#:4 R.Time:14.9(Scan#:1303)  
MassPeaks:338  
RawMode:Averaged 14.8-14.9(1302-1304) BasePeak:93(46001)  
BG Mode:Calc. from Peak

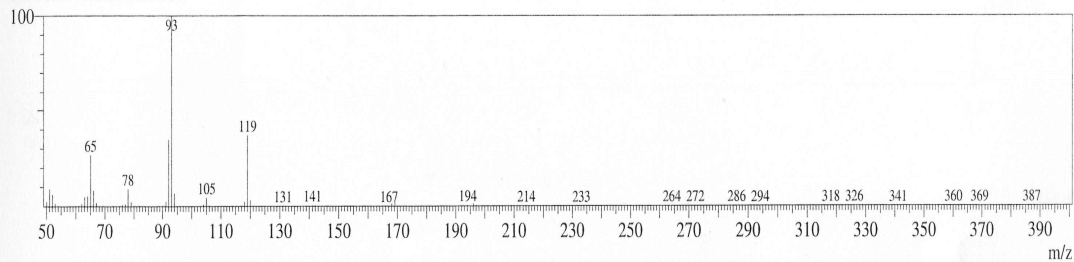

Line#:5 R.Time:16.5(Scan#:1501)  
MassPeaks:368  
RawMode:Averaged 16.5-16.5(1500-1502) BasePeak:107(58030)  
BG Mode:Calc. from Peak

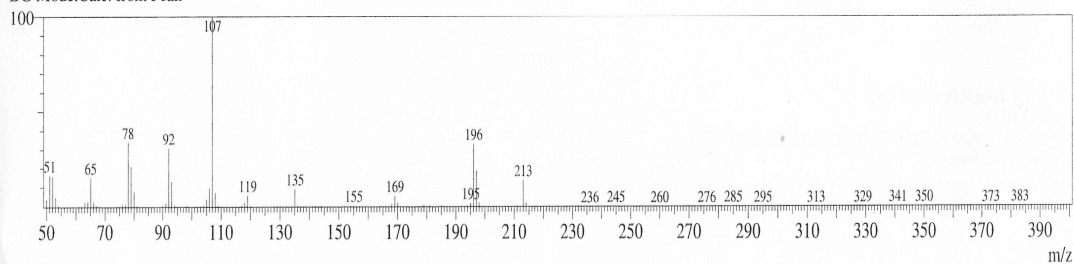

## GC-MS Spectra of Entry 14 Table 2

Central Salt and Marine Chemicals Research Institute

9/7/2011 12:31:26

C:\GCMSsolution\Data\Project1\ANALYTICAL SCINCE\RAJENDRA PATIL\RDP 1012\_RTX 5 \_140311\_05.QGD

### Sample Information

Analyzed by : Admin  
Analyzed : 3/14/2011 1:59:08 PM  
Sample Type : Unknown  
Sample Name : RDP 1012  
Sample ID : RDP 1012  
Vial # : 1  
Injection Volume : 2.000  
Data File : C:\GCMSsolution\Data\Project1\ANALYTICAL SCINCE\RAJENDRA PATIL\RDP 1012\_RTX 5 \_140311\_05.QGD  
Method File : C:\GCMSsolution\Data\Project1\PNBRR.qgm  
Report File :  
Tuning File : C:\GCMSsolution\System\Tune1\tuning\_191010\_ELqgt

Chromatogram RDP 1012 C:\GCMSsolution\Data\Project1\ANALYTICAL SCINCE\RAJENDRA PATIL\RDP 1012\_RTX 5 \_140311\_05.QGD

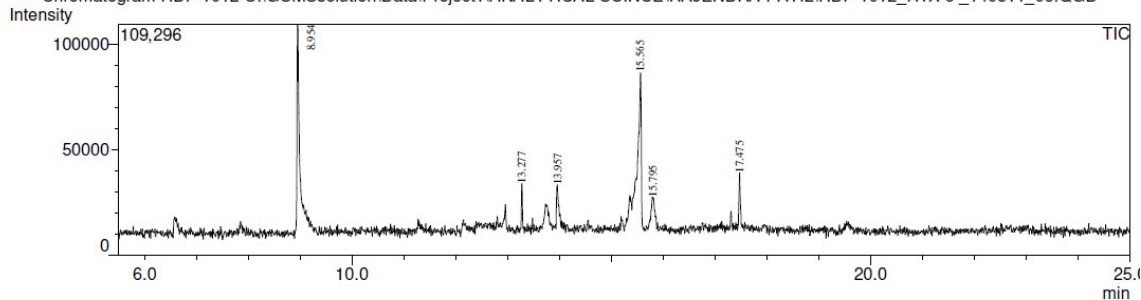

| Peak# | R.Time | Area   | Area%  | Height | Height% | Name         |
|-------|--------|--------|--------|--------|---------|--------------|
| 1     | 3.520  | 129322 | 13.43  | 50688  | 16.97   | Pentyl amine |
| 2     | 8.954  | 322120 | 33.45  | 97264  | 32.56   | Imine        |
| 3     | 13.277 | 26710  | 2.77   | 21699  | 7.26    |              |
| 4     | 13.957 | 54081  | 5.62   | 20651  | 6.91    |              |
| 5     | 15.565 | 348282 | 36.16  | 72104  | 24.14   |              |
| 6     | 15.795 | 39252  | 4.08   | 10962  | 3.67    |              |
| 7     | 17.475 | 43335  | 4.50   | 25339  | 8.48    |              |
|       |        | 963102 | 100.00 | 298707 | 100.00  |              |

### Spectrum

Line#1 R.Time:3.5(Scan#:171)

MassPeaks:291

RawMode:Averaged 3.5-3.5(170-172) BasePeak:87(29170)

BG Mode:Calc. from Peak

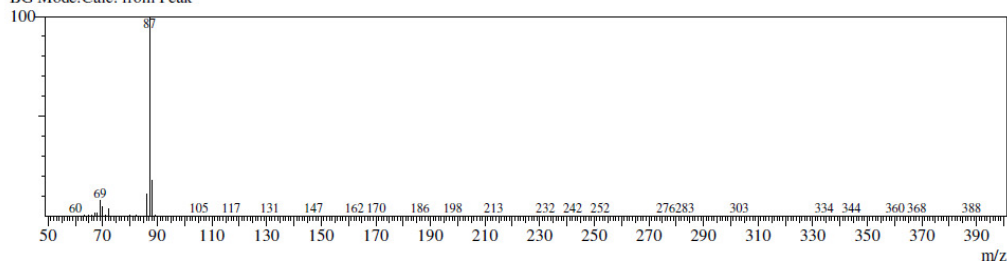

Line#2 R.Time:9.0(Scan#:823)

MassPeaks:283

RawMode:Averaged 8.9-9.0(822-824) BasePeak:98(41023)

BG Mode:Calc. from Peak

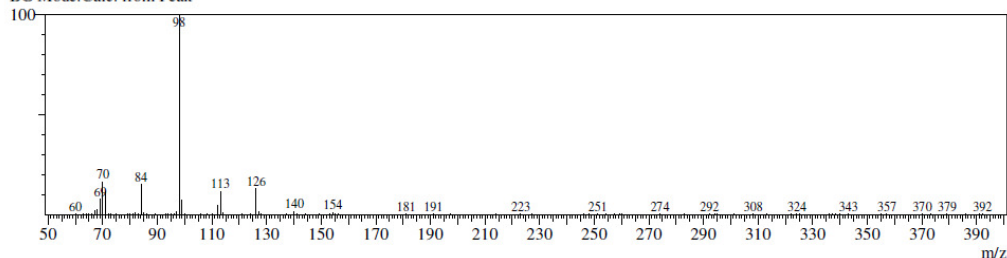

Supplement: c2ra20339a.pdf [file c2ra20339a.pdf]
